# Supplementary material for: Psidium guajava in the Galapagos Islands: Population genetics and history of an invasive species
Source: PubMed Central journal article supplement (PMC6415804; doi:10.1371/journal.pone.0203737), 2019-03-13

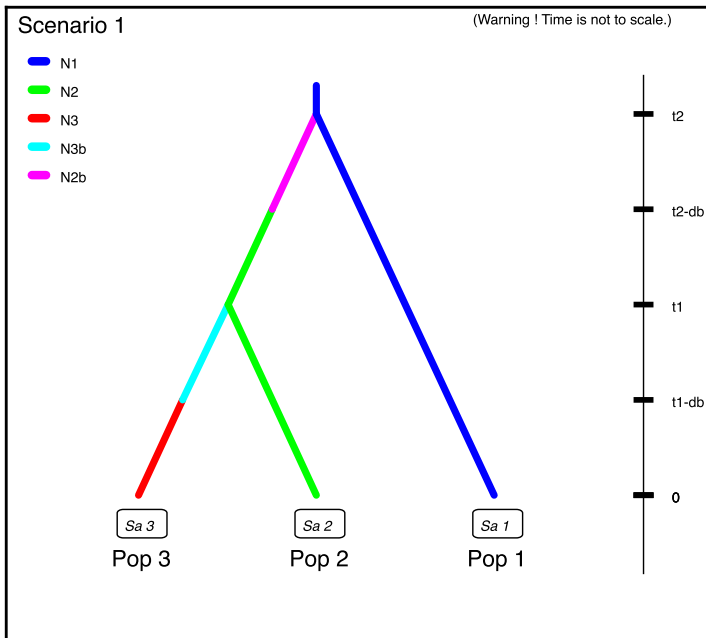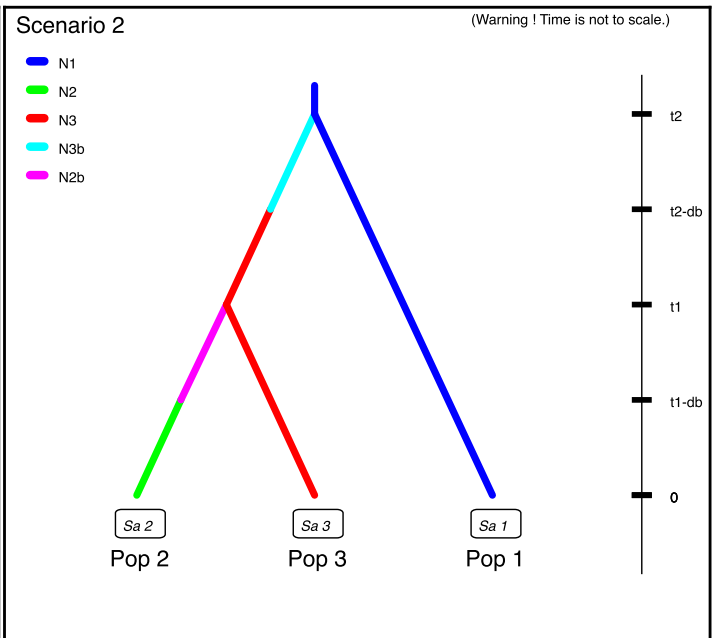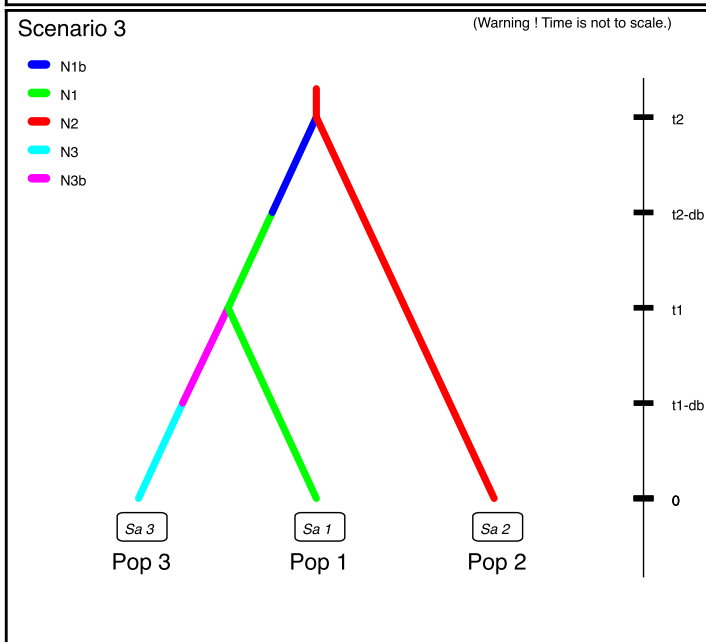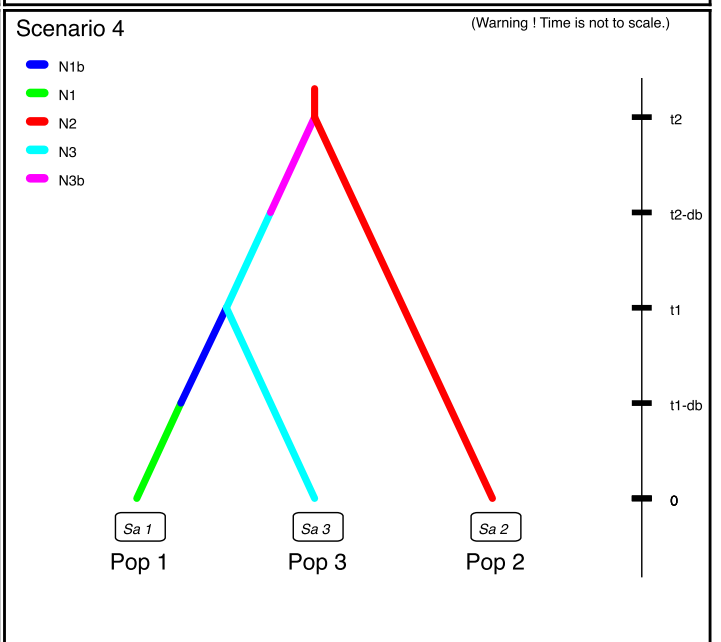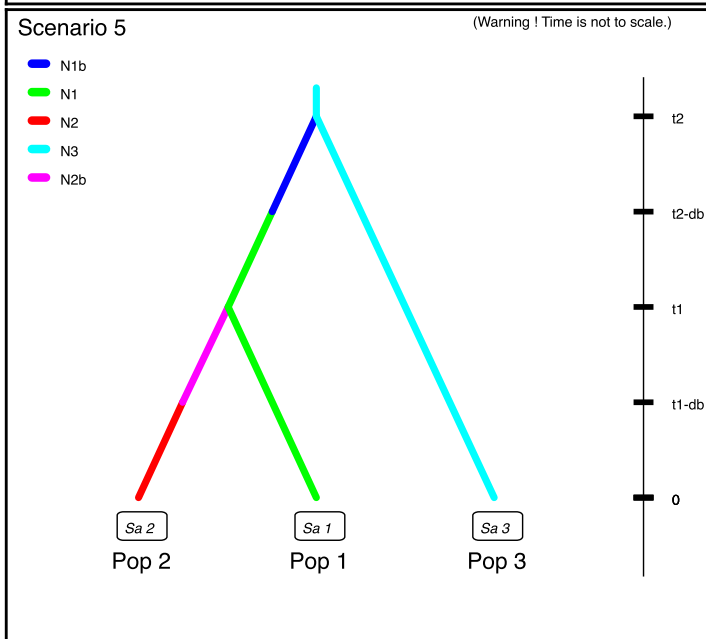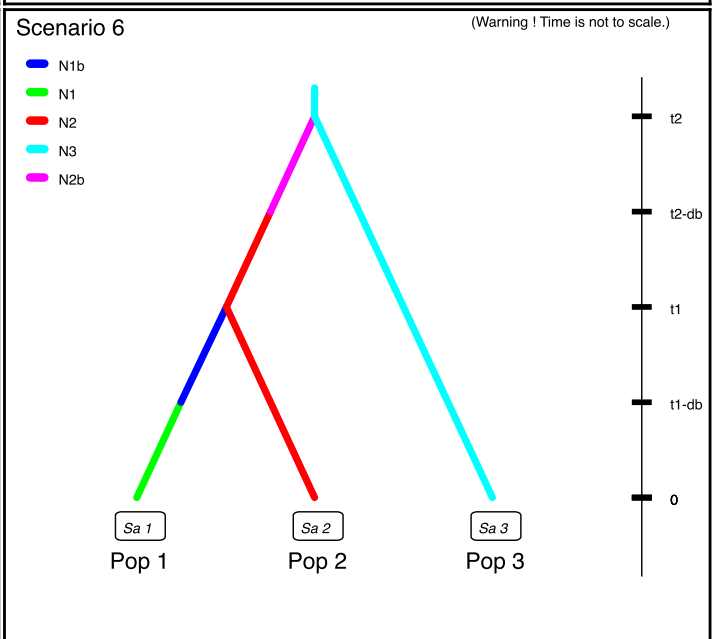

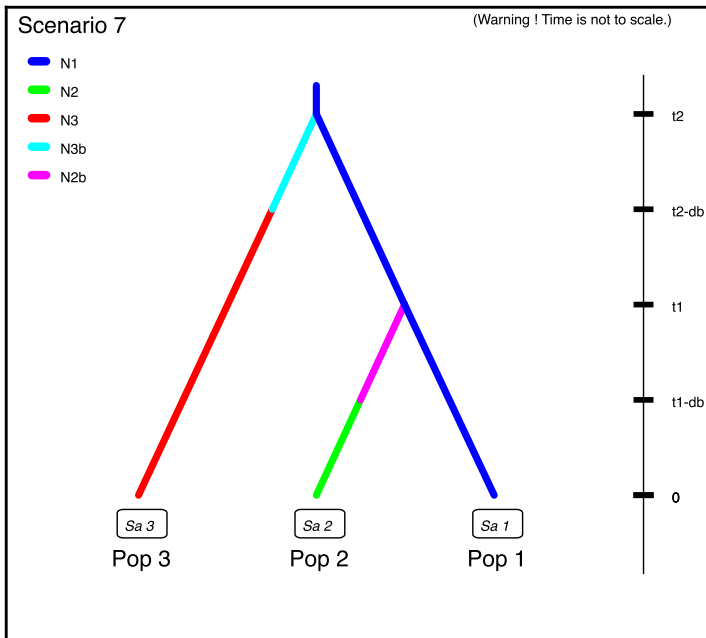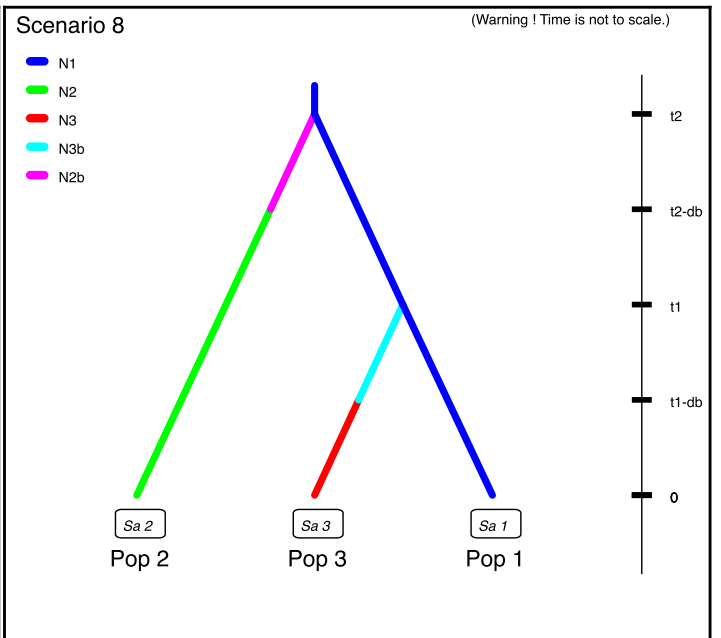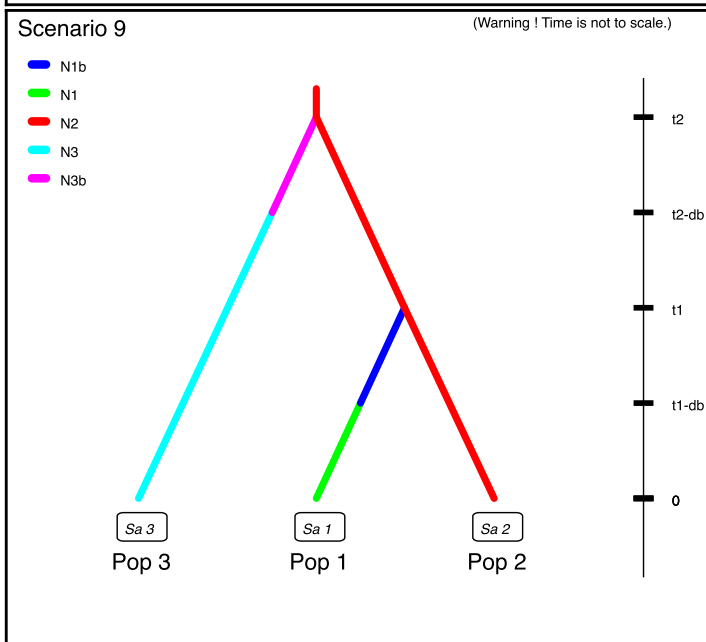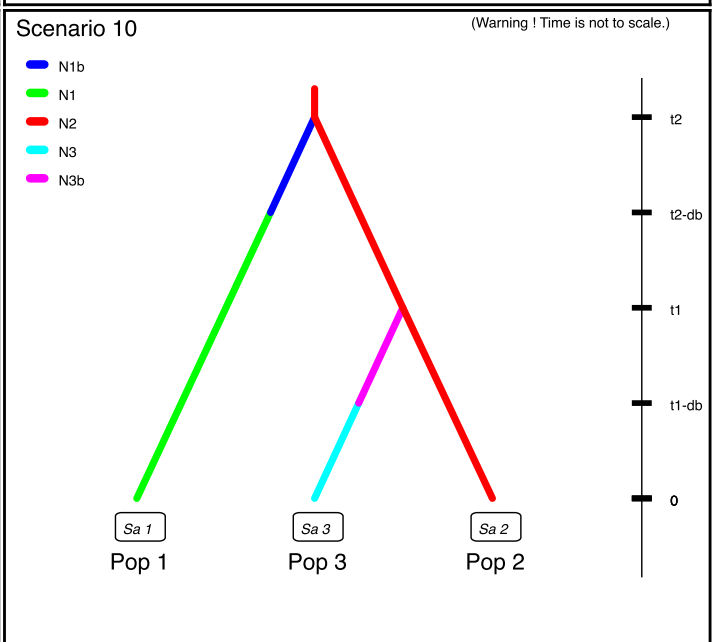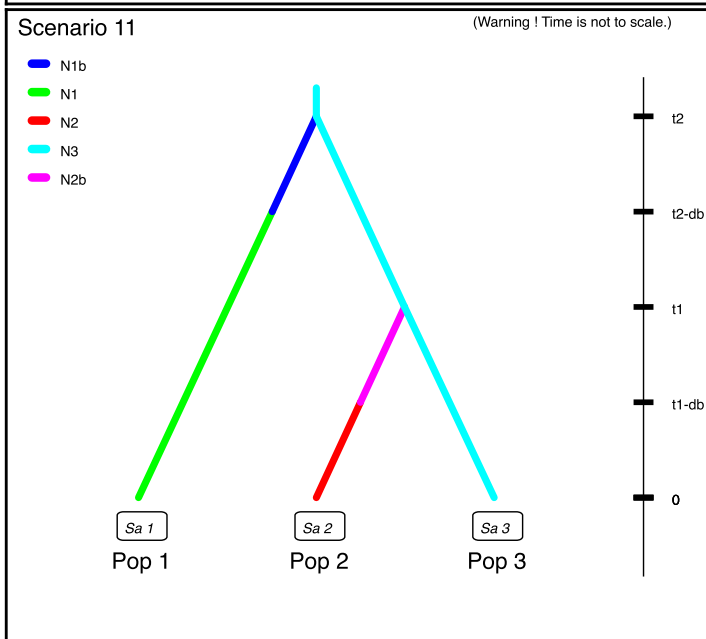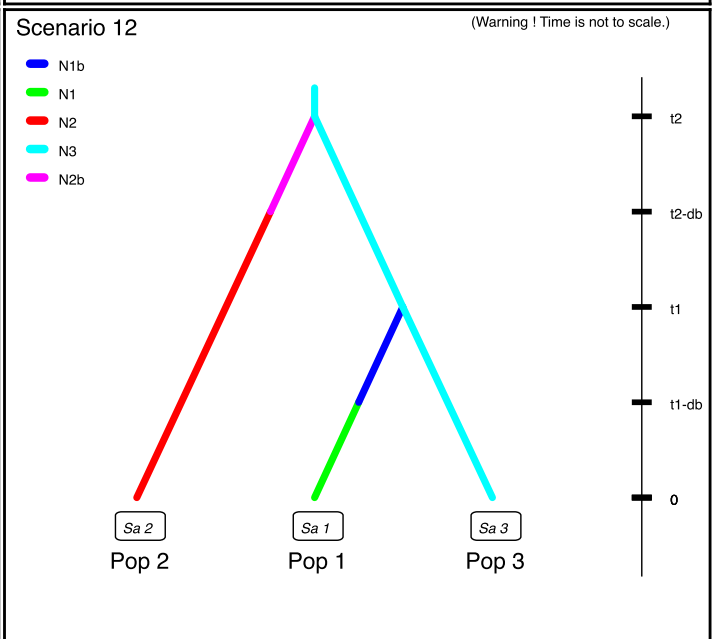

### Scenario 13

(Warning ! Time is not to scale.)

- N1
- N2
- N3
- N3b

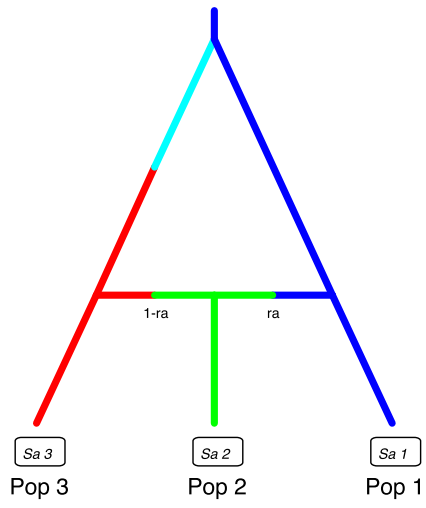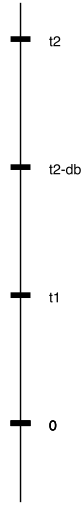

### Scenario 14

(Warning ! Time is not to scale.)

- N1b
- N1
- N2
- N3

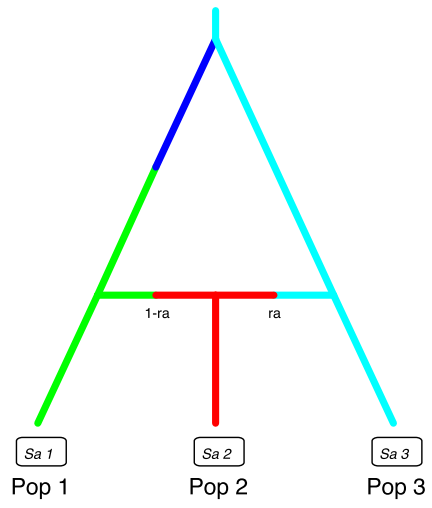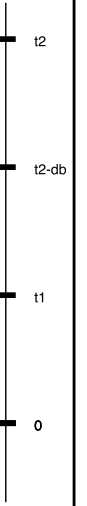

Supplement: pone.0203737.s001.pdf [file pone.0203737.s001.pdf]
