# Supplementary material for: Psidium guajava in the Galapagos Islands: Population genetics and history of an invasive species
Source: PubMed Central journal article supplement (PMC6415804; doi:10.1371/journal.pone.0203737), 2019-03-13
Supplement: pone.0203737.s002.pdf [file pone.0203737.s002.pdf]

**DIYABC 2.0 output – approximate posterior probability distributions**  
**Scenario 11**

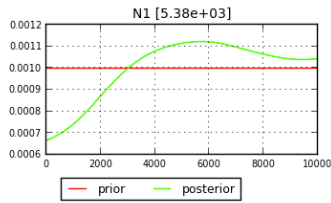

Average = 5.32e03  
 Median = 5.38e03  
 Q2.5 = 4.50e02  
 Q97.5 = 9.80e03

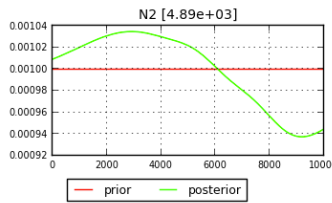

Average = 4.92e03  
 Median = 4.89e03  
 Q2.5 = 2.64e02  
 Q97.5 = 9.76e03

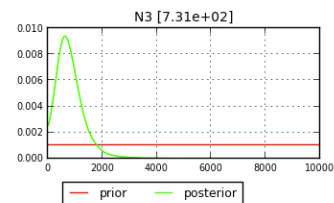

Average = 8.42e02  
 Median = 7.31e02  
 Q2.5 = 2.13e02  
 Q97.5 = 2.10e03

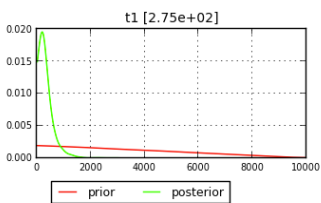

Average = 3.53e02  
 Median = 2.75e02  
 Q2.5 = 4.88e01  
 Q97.5 = 1.13e03

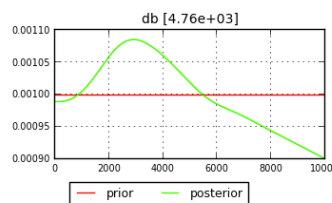

Average = 4.88e03  
 Median = 4.76e03  
 Q2.5 = 2.42e02  
 Q97.5 = 9.72e03

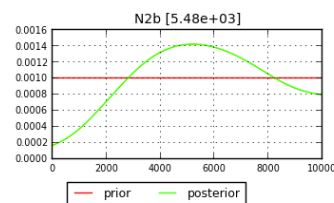

Average = 5.52e03  
 Median = 5.48e03  
 Q2.5 = 1.35e03  
 Q97.5 = 9.68e03

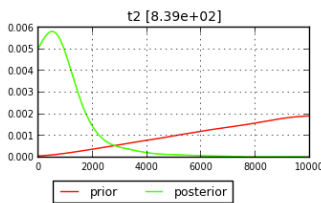

Average = 1.24e03  
 Median = 8.39e02  
 Q2.5 = 1.80e02  
 Q97.5 = 5.29e03

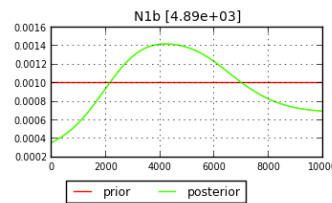

Average = 5.06e03  
 Median = 4.89e03  
 Q2.5 = 8.84e02  
 Q97.5 = 9.63e03

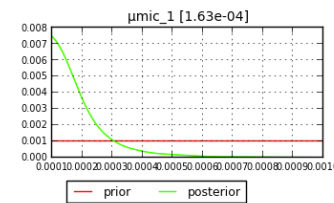

Average = 1.96e04  
 Median = 1.63e04  
 Q2.5 = 1.04e04  
 Q97.5 = 4.98e04

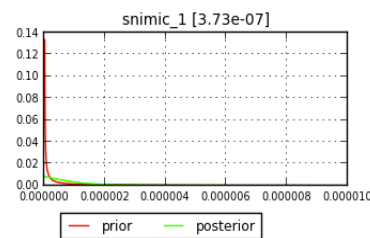

Average = 1.33e06  
 Median = 3.73e07  
 Q2.5 = 1.30e08  
 Q97.5 = 7.52e06
